# Supplementary material
Source: ML conference proceedings conference paper supplement (https://openreview.net/forum?id=hIUUeitVfo)
Supplement: supplementary_material [file attachment]

# Inference of a Rumor's Source in the Independent Cascade Model

Petra Berenbrink, Max Hahn-Klimroth, Dominik Kaaser, Lena Krieg, Malin Rau

## INTRODUCTION

We consider the so-called *Independent Cascade Model* for rumor spreading or epidemic processes popularized by Kempe et al. [2003]. In this model, a small subset of nodes from a network are the source of a rumor. In discrete time steps, each informed node "infects" each of its uninformed neighbors with probability  $p$ . While many facets of this process are studied in the literature, less is known about the inference problem: given a number of infected nodes in a network, can we learn the source of the rumor?

## INDEPENDANT CASCADE MODEL

We observe the following model: Let  $G = (V, E)$  be a graph. The model works in discrete steps. Every node has exactly one of the following attributes in every step:

- currently active
- formerly active
- inactive

$I_t$  denotes the set of active nodes in step  $t$ . All active nodes  $I_t$  have a chance to infect each of their inactive neighbors with probability  $p$ . All the infected neighbors of the nodes in  $I_t$  form the set  $I_{t+1}$ .

## ML-ESTIMATOR

We assume that we observe the network at an unknown time and can only see the set nodes ( $X^*$ ) that are currently active. We also assume that the source of the rumor is a single node  $I_0 = \{\omega\}$ . Note that  $X^*$  can be empty.

Let

$$\mathcal{C} = \{v \in V \mid \exists t \in \mathbb{N} : \forall w \in X^* : \text{dist}(v, w) = t\}$$

As long as  $X^*$  is not empty, our estimator is defined as the *closest candidate*:

$$\omega_c = \arg \min_{v \in \mathcal{C}} \{ \text{dist}(v, w) \mid w \in X^* \}$$

If  $|\mathcal{C}| < 2$ , then the estimation fails.

## VISUALIZATION

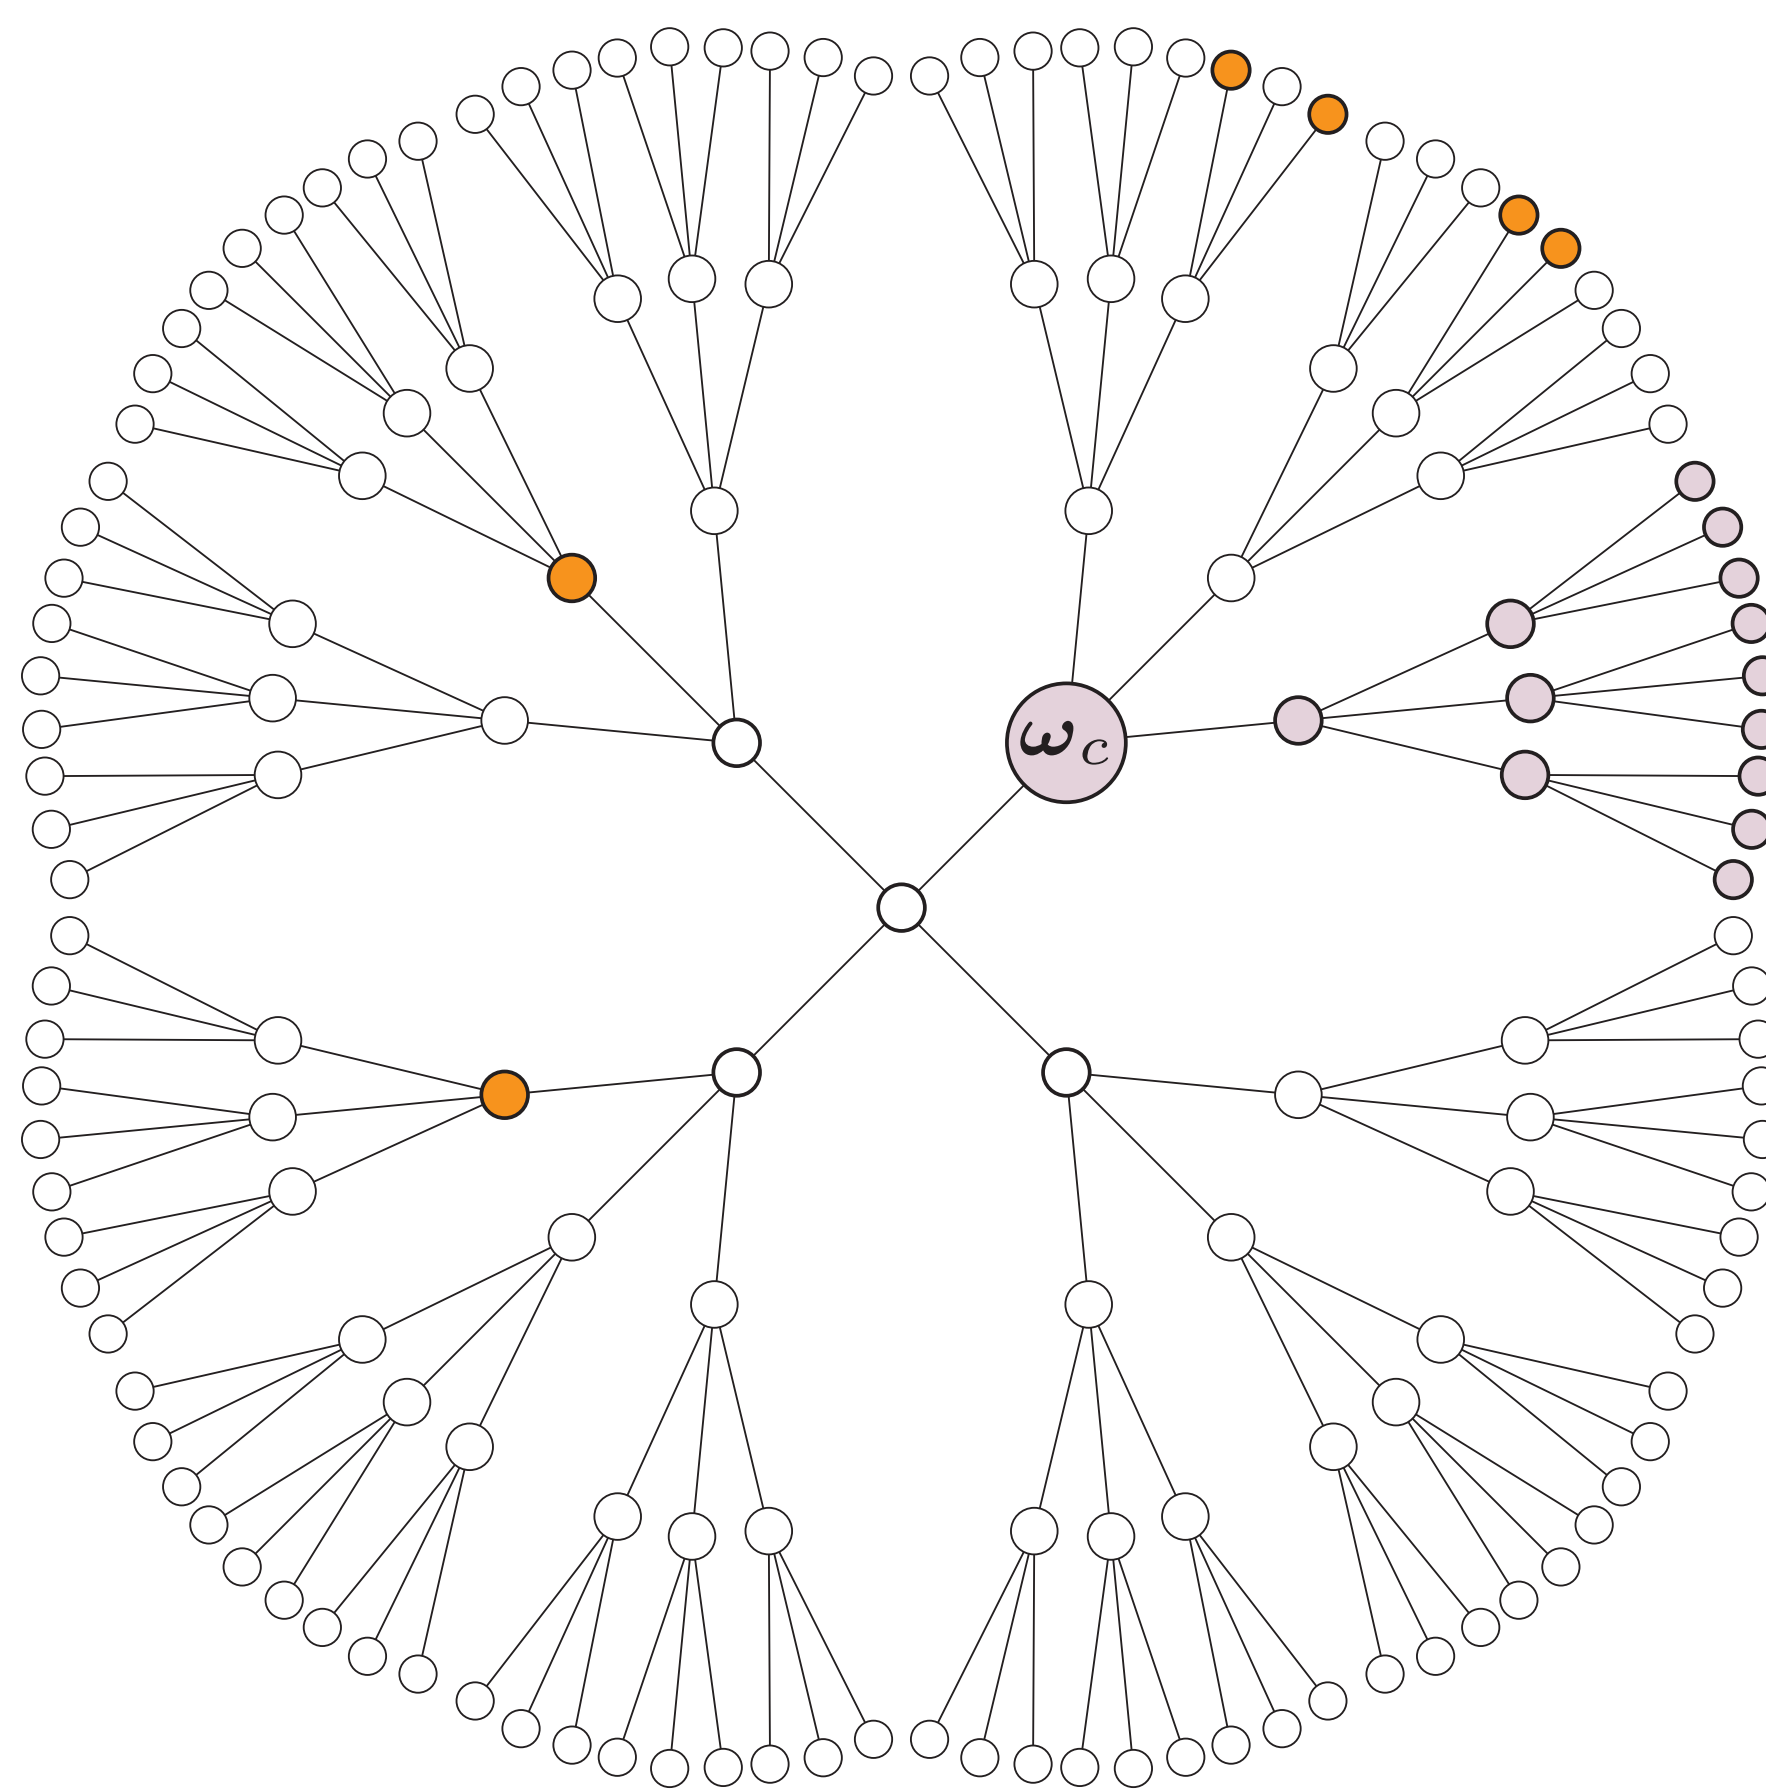

(a) Visualization of a possible snapshot of the spreading process in a 4-regular tree. The orange nodes are the active elements. The candidate set  $\mathcal{C}$  of possible rumor's sources consists of all vertices in the purple sub-tree.

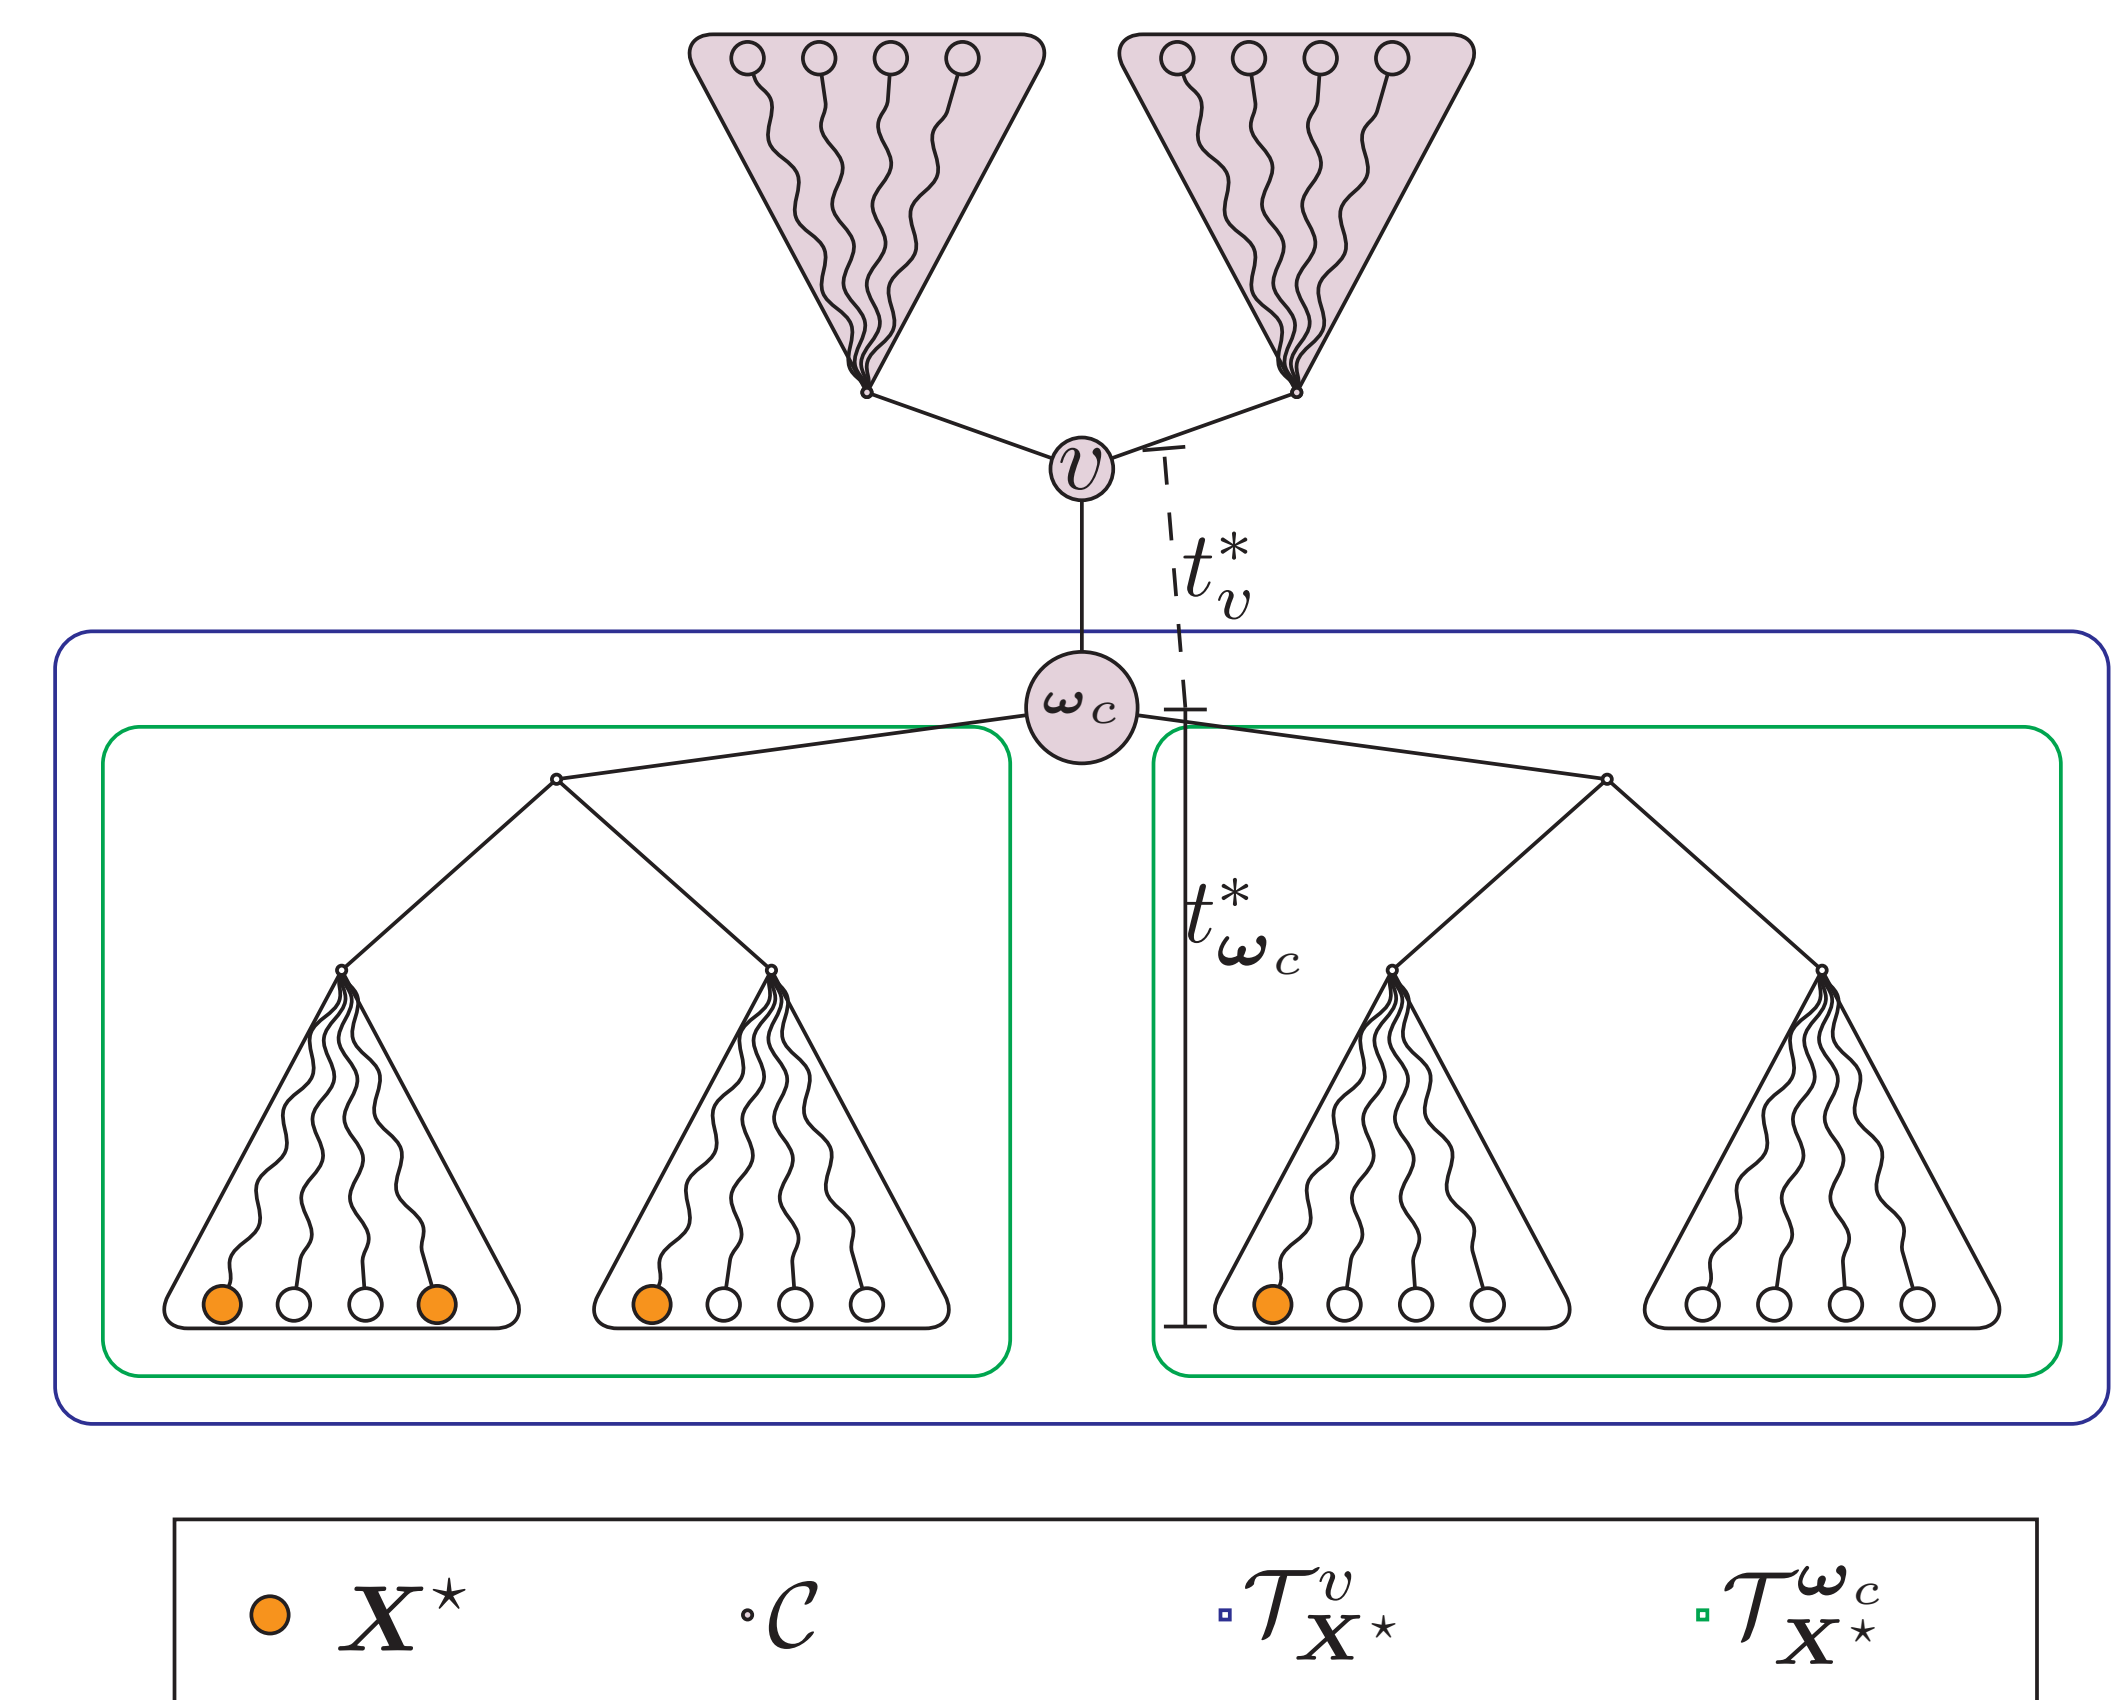

(b) Here,  $\omega_c$  spawned three sub-trees out of which two contain active elements of  $X^*$  (orange) and one does not contain active elements (purple). Thus,  $\mathcal{C}$  consists of all vertices in the purple sub-tree rooted at  $\omega_c$ .

## D-REGULAR TREES

**Theorem 1** (*d*-regular trees). Let  $p$  be the spreading parameter of the Independent Cascade Model and  $t = \omega(1)$  the amount of steps. Then, the following phase-transitions occur.

- If  $(d-1) \cdot p \leq 1$ , any estimator fails at weak detection with probability  $1 - o_t(1)$ .
- If  $1 < (d-1) \cdot p = \Theta(1)$  then the closest candidate  $\omega_c$  is the source of the rumor  $\omega$  with constant probability (weak detection). Furthermore, the probability that  $\text{dist}(\omega_c, \omega) > k$  is at most  $\exp(-\Omega(k))$ .
- If  $(d-1) \cdot p = \omega(1)$  then closest candidate  $\omega_c$  is the source of the rumor  $\omega$  with probability  $1 - o_d(1)$  (strong detection).

<sup>a</sup>We denote by  $o_t(1)$  a quantity that tends to zero with  $t \rightarrow \infty$ .

## Po(λ)-GALTON-WATSON TREES

**Theorem 2** (Galton-Watson processes). Let  $p$  be the spreading parameter of the Independent Cascade Model and  $t = \omega(1)$  the amount of steps. Then, the following phase-transitions occur.

- If  $\lambda p \leq 1$ , any estimator fails at weak detection with probability  $1 - o_t(1)$ .
- If  $1 < \lambda p = \Theta(1)$ , then the closest candidate  $\omega_c$  is the source of the rumor  $\omega$  with positive probability (weak detection). Furthermore, the probability that  $\text{dist}(\omega_c, \omega) > k$  is at most  $\exp(-\Omega(k))$ .
- If  $\lambda p = \omega(1)$ , then closest candidate  $\omega_c$  is the source of the rumor  $\omega$  with probability  $1 - o_\lambda(1)$  (strong detection).

## EXPERIMENTS

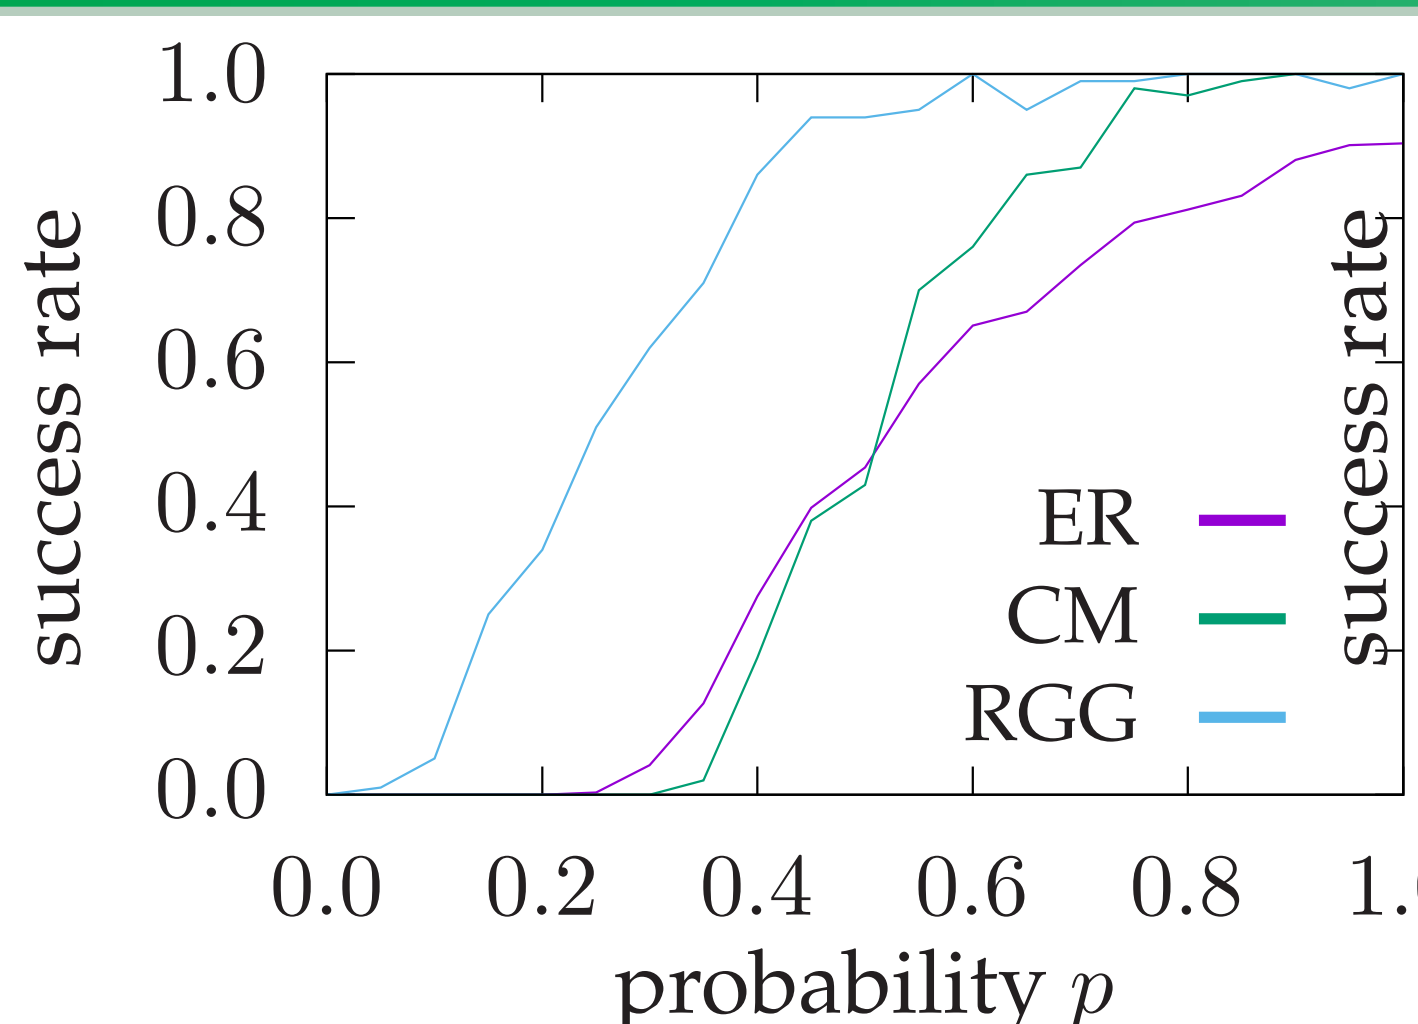

**Figure 2:** Success rates for Erdős-Rényi graphs, random regular graphs, and random geometric graphs.

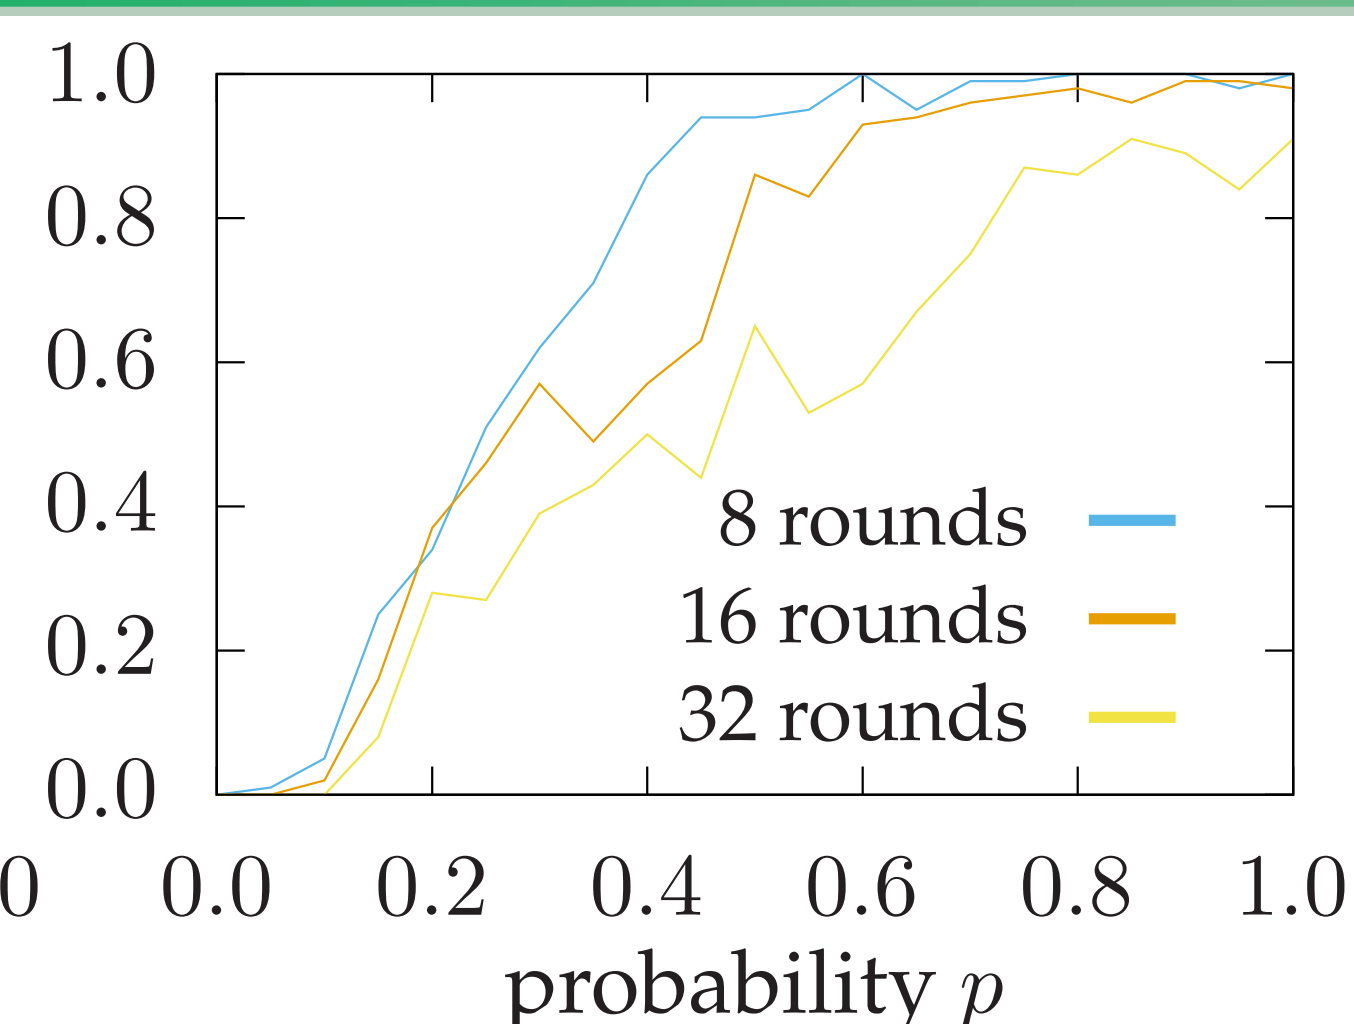

**Figure 3:** Success rates in a random geometric graph with expected node degree 16 after 8, 16, 32 steps

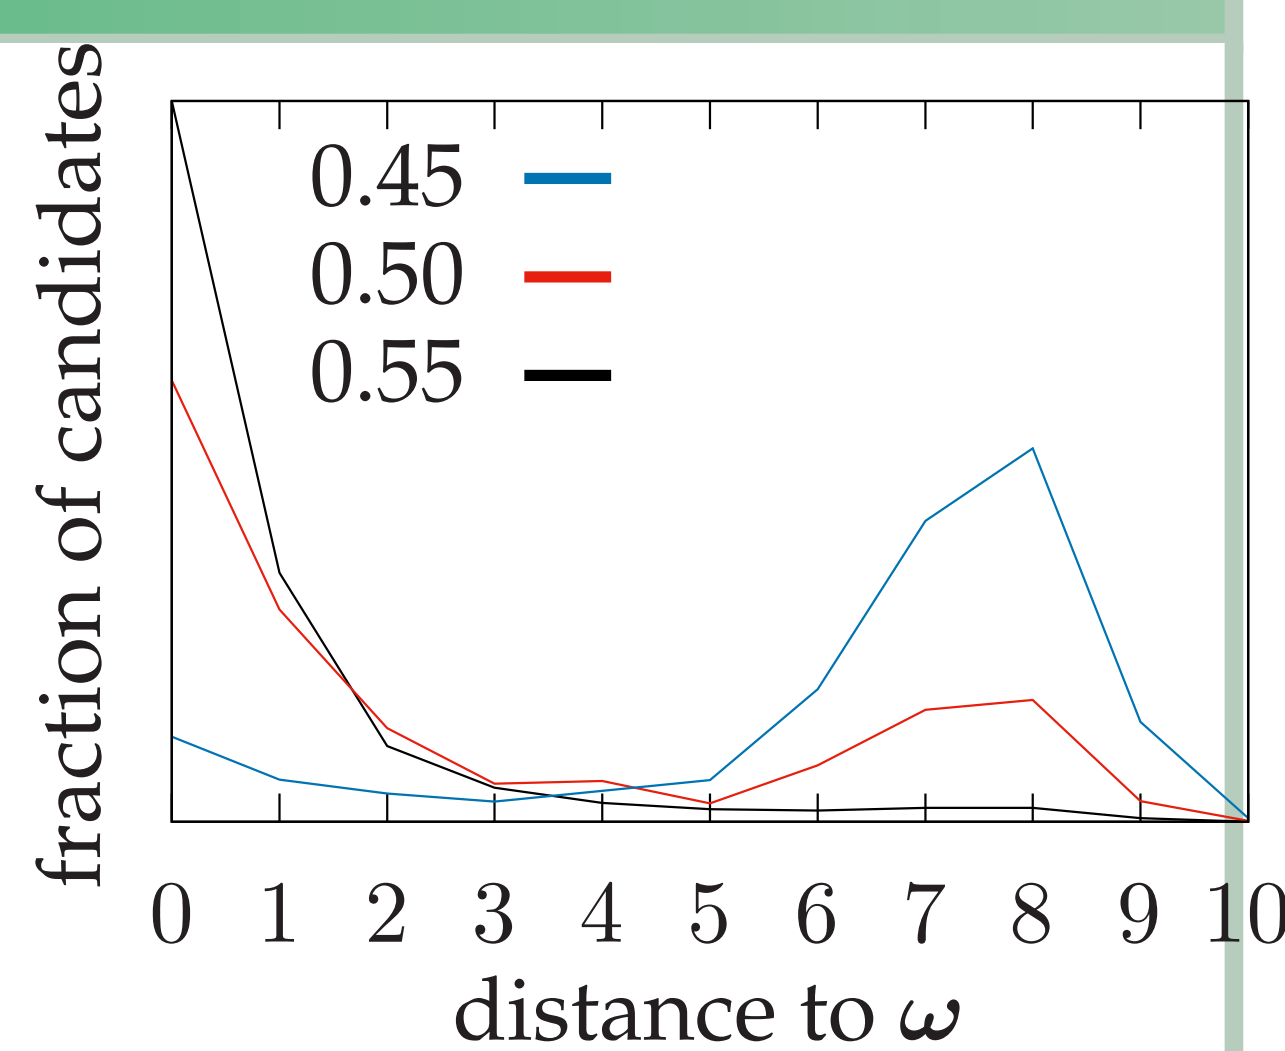

**Figure 4:** Histogram of the distribution of the distances of the candidates returned by our heuristic to  $\omega$  for  $p = 0.45, 0.5, 0.55$ .

## REFERENCES

- [1] Petra Berenbrink, Max Hahn-Klimroth, Dominik Kaaser, Lena Krieg, Malin Rau: Inference of a Rumor's Source in the Independent Cascade Model. UAI 2023.
- [2] David Kempe, Jon Kleinberg, Éva Tardos: Maximizing the spread of influence through a social network. SIGKDD 2003.
